# Supplementary material for: Mutually Exclusive Expression of Closely Related Odorant-Binding Proteins 9A and 9B in the Antenna of the Red Flour Beetle Tribolium castaneum
Source: Biomolecules. 2021 Oct 12;11(10):1502. doi: 10.3390/biom11101502 (PMC8533528; doi:10.3390/biom11101502)
Supplement: Supplementary file 1 [file biomolecules-11-01502-s001.zip › biomolecules-1380979-supplementary.pdf]

Supplementary

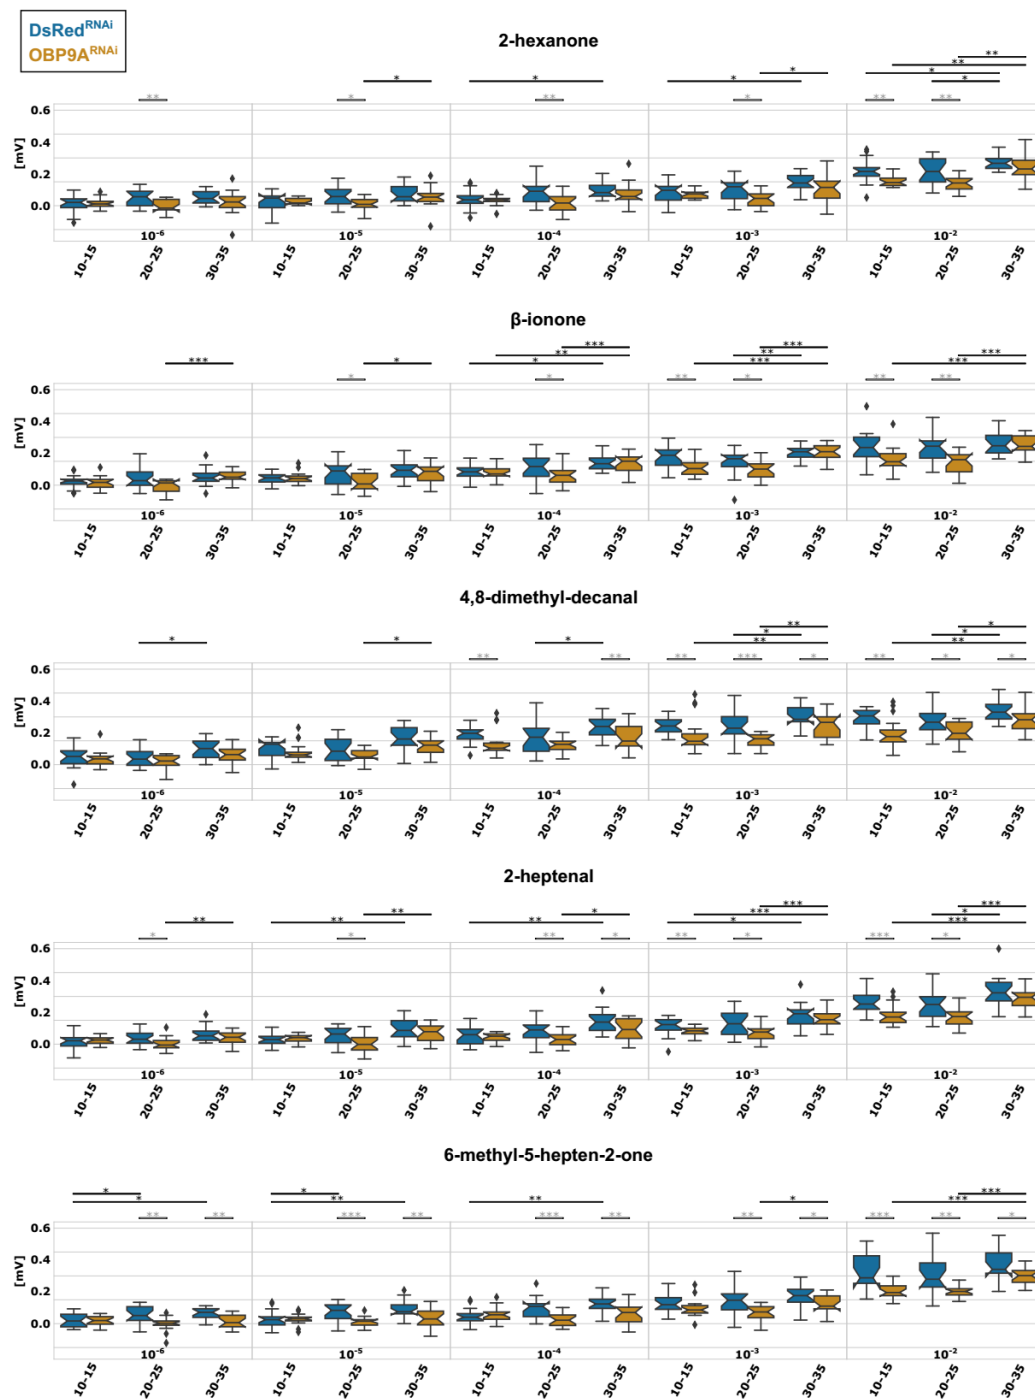

**Figure S1.** Peak EAG responses in mV of six ( $N_{\text{animals}}=6$ ,  $n_{\text{replicates}}=3$ ) female beetles to the olfactory stimulants 2-hexanone,  $\beta$ -ionone, 4,8-dimethyl-decanal, 2-heptenal, or 6-methyl-5-hepten-2-one after injection with dsRed (blue boxes) or TcasOBP9A (orange boxes) dsRNA and measured at three different post injections periods (10-15, 20-25, or 30-35 DPI). Statistical analysis between DsRed and OBPA9A dsRNA (grey asterisk) or between different DPI (black asterisk) was performed per odor and dilution by Dunn's multiple comparison test, following initial Kruskal-Wallis test. Asterisks represent statistical significance levels (Holm corrected) of difference in median (\*  $p_{\text{corr}} < 0.05$ , \*\*  $p_{\text{corr}} < 0.01$ , \*\*\*  $p_{\text{corr}} < 0.001$ ).

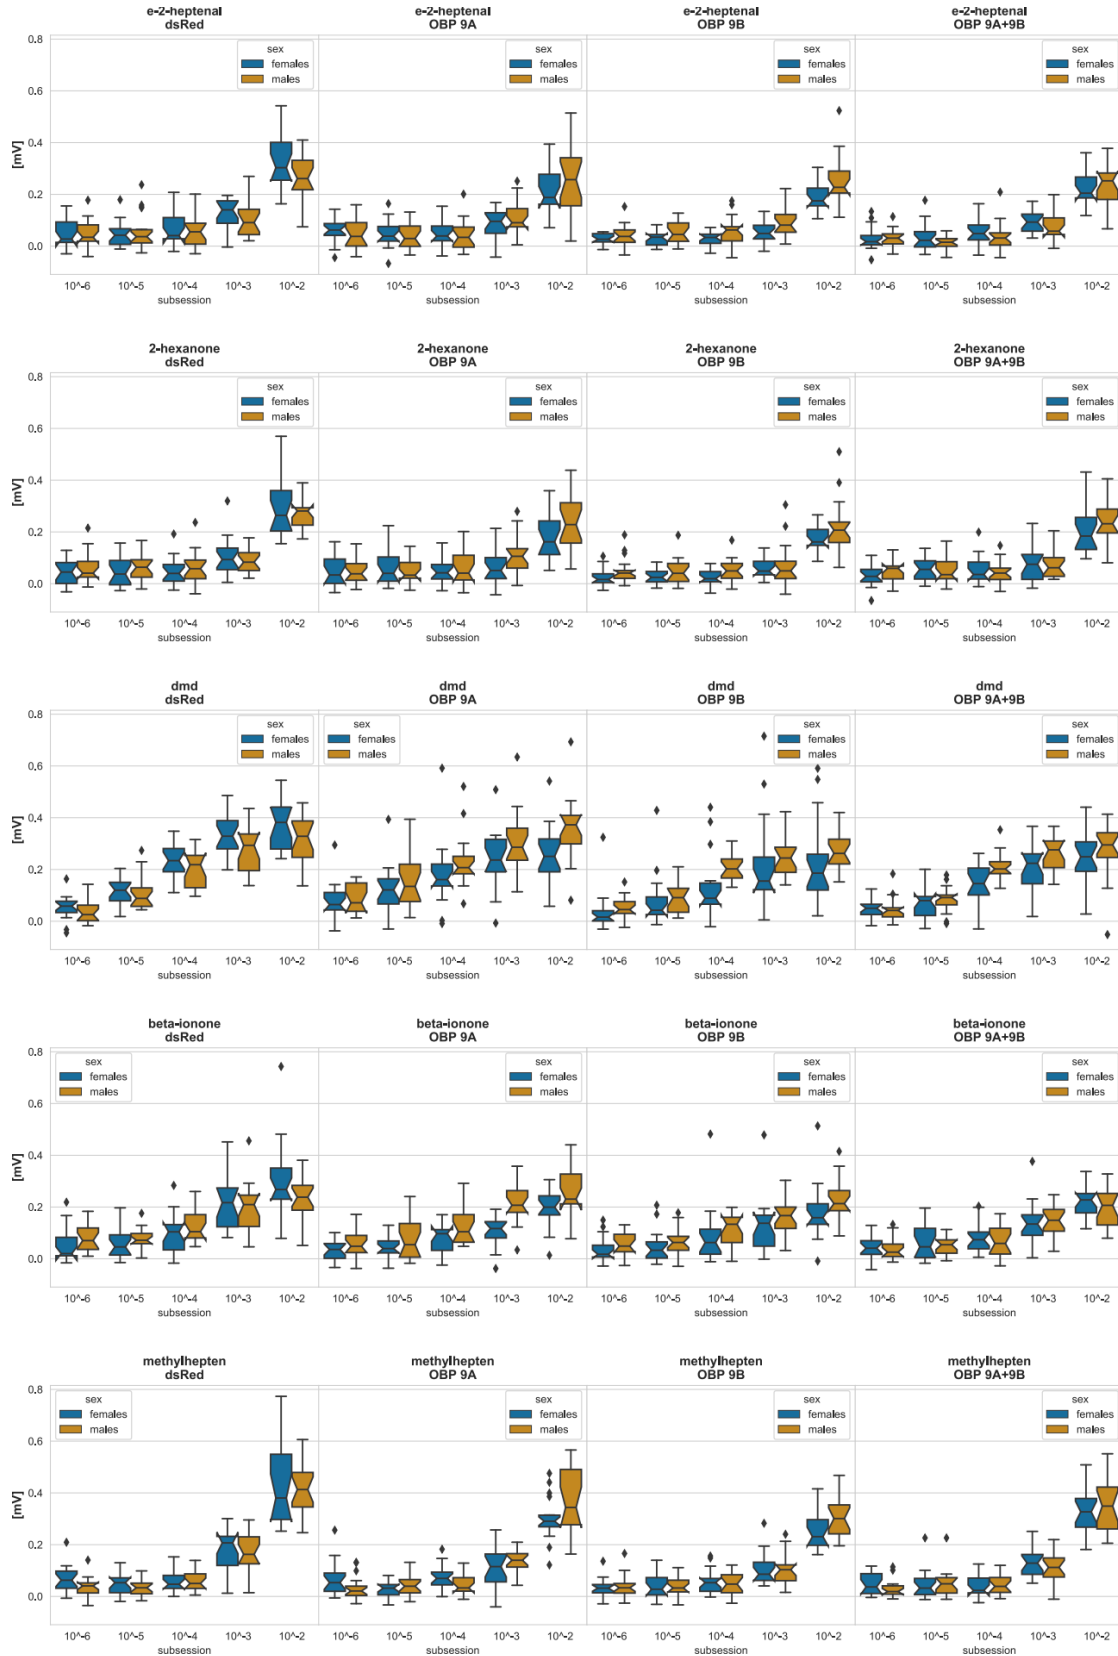

**Figure S2.** Peak EAG responses in mV of six male ( $N_{\text{animals}}=6$ ,  $n_{\text{replicates}}=3$ ; orange boxes) and six female ( $N_{\text{animals}}=6$ ,  $n_{\text{replicates}}=3$ ; blue boxes) beetles to the olfactory stimulants (E)-2-heptenal, 2-hexanone, 4,8-dimethyldecanal,  $\beta$ -ionone, or 6-methyl-5-hepten-2-one at 10-15 DPI with dsRed, TcasOBP9A, TcasOBP9B, or TcasOBP9A+9B dsRNA injection. The whiskers representing the 5–95% percentile of the peak amplitude EAG response in mV after robust LOESS smoothing and normalization to five log<sub>10</sub> dilutions (10<sup>-2</sup>–10<sup>-6</sup>).

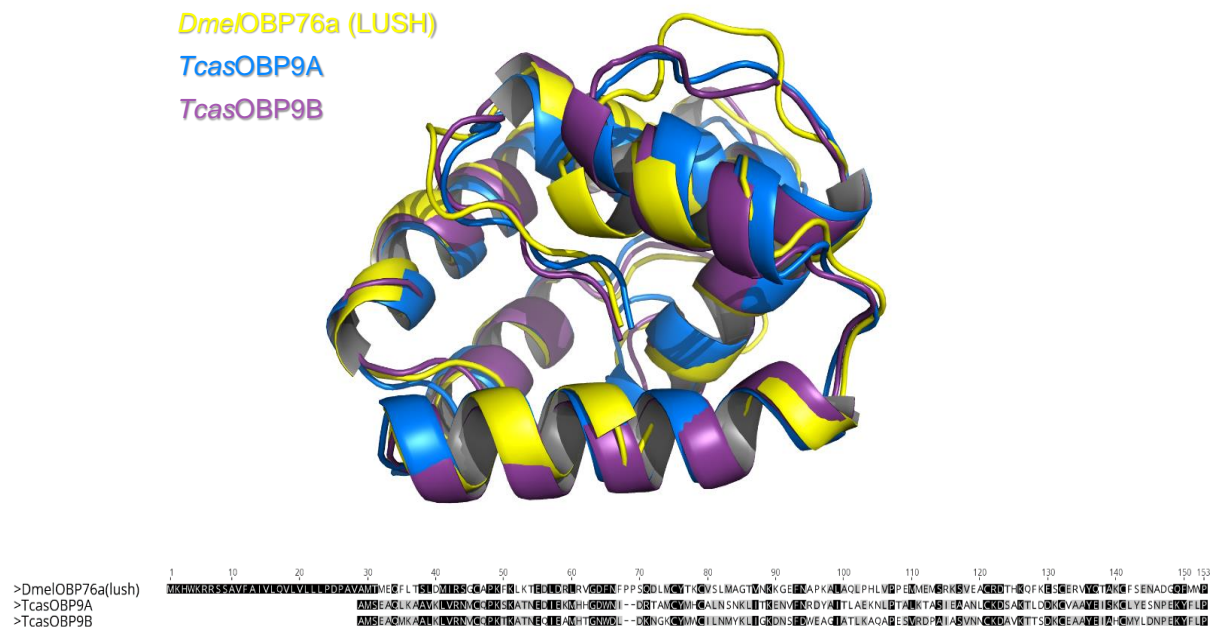

**Figure S3.** Structural superposition of the *Drosophila* OBP76a (Lush) with homology models of *Tcas*OBP9A and *Tcas*OBP9B depicted as cartoon. Below the corresponding sequence alignment is given.

*TcasOBP9A* 2-hexanone

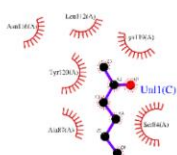

| SOURCE ATOMS | TARGET ATOMS | DISTANCE |
|--------------|--------------|----------|
| $1/2C_1$     | $1/2C_2$     | 0.379    |
| $1/2C_1$     | $1/2C_3$     | 0.379    |
| $1/2C_1$     | $1/2C_4$     | 0.382    |
| $1/2C_1$     | $1/2C_5$     | 0.379    |
| $1/2C_1$     | $1/2C_6$     | 0.381    |
| $1/2C_1$     | $1/2C_7$     | 0.383    |
| $1/2C_1$     | $1/2C_8$     | 0.373    |
| $1/2C_1$     | $1/2C_9$     | 0.379    |
| $1/2C_1$     | $1/2C_{10}$  | 0.385    |
| $1/2C_1$     | $1/2C_{11}$  | 0.363    |
| $1/2C_1$     | $1/2C_{12}$  | 0.378    |
| $1/2C_1$     | $1/2C_{13}$  | 0.372    |
| $1/2C_1$     | $1/2C_{14}$  | 0.349    |
| $1/2C_1$     | $1/2C_{15}$  | 0.358    |
| $1/2C_1$     | $1/2C_{16}$  | 0.387    |
| $1/2C_1$     | $1/2C_{17}$  | 0.342    |
| $1/2C_1$     | $1/2C_{18}$  | 0.379    |
| $1/2C_1$     | $1/2C_{19}$  | 0.370    |
| $1/2C_1$     | $1/2C_{20}$  | 0.370    |
| $1/2C_1$     | $1/2C_{21}$  | 0.363    |
| $1/2C_1$     | $1/2C_{22}$  | 0.372    |
| $1/2C_1$     | $1/2C_{23}$  | 0.369    |
| $1/2C_1$     | $1/2C_{24}$  | 0.350    |
| $1/2C_1$     | $1/2C_{25}$  | 0.350    |
| $1/2C_1$     | $1/2C_{26}$  | 0.350    |
| $1/2C_1$     | $1/2C_{27}$  | 0.367    |
| $1/2C_1$     | $1/2C_{28}$  | 0.375    |
| $1/2C_1$     | $1/2C_{29}$  | 0.385    |

*TcasOBP9B* 2-hexanone

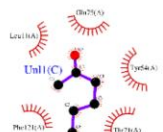

| SOURCE ATOMS      | TARGET ATOMS                 | DISTANCE |
|-------------------|------------------------------|----------|
| /J1/2/ 10M30/     | /C1/C2/ 10M/ 54T190/ /C2/C2/ | 3.77     |
| /J1/2/ 54T190/    | /C2/C2/ 10M/ 54T190/         | 3.65     |
| /J1/2/ 54T190/    | /C1/C1/ 10M/ 54T190/         | 3.80     |
| /J1/2/ 711700/    | /C6/C2/ 10M/ 54T190/         | 3.86     |
| /J1/2/ 759000/    | /C1/C1/ 10M/ 54T190/         | 3.88     |
| /J1/2/ 10M30/     | /J1/2/ 10M/ 54T190/          | 3.70     |
| /J1/2/ 54T190/    | /O1/O1/ 10M/ 54T190/         | 3.70     |
| /J1/2/ 54T190/    | /C1/C1/ 10M/ 54T190/         | 3.70     |
| /J1/2/ 54T190/    | /C1/C2/ 10M/ 54T190/         | 3.57     |
| /J1/2/ 54T190/    | /C4/C2/ 10M/ 54T190/         | 3.83     |
| /J1/2/ 54T190/    | /C1/C1/ 10M/ 54T190/         | 3.79     |
| /J1/2/ 10M30/     | /C1/C1/ 10M/ 54T190/         | 3.75     |
| /J1/2/ 54T190/    | /C2/C2/ 10M/ 54T190/         | 3.75     |
| /J1/2/ 54T190/    | /C1/C1/ 10M/ 54T190/         | 3.75     |
| /J1/2/ 711700/    | /C6/C2/ 10M/ 54T190/         | 3.89     |
| /J1/2/ 10M30/     | /O6/C1/ 10M/ 721800/ /C1/C1/ | 3.77     |
| /J1/2/ 54T190/    | /C2/C1/ 10M/ 54T190/         | 3.73     |
| /J1/2/ 54T190/    | /C2/C1/ 10M/ 54T190/         | 3.73     |
| /J1/2/ 711700/    | /C6/C2/ 10M/ 54T190/         | 3.79     |
| /J1/2/ 10M30/     | /O1/O6/ 10M/ 721800/ /C1/C1/ | 3.67     |
| /J1/2/ 54T190/    | /C2/C1/ 10M/ 54T190/         | 3.50     |
| /J1/2/ 54T190/    | /O1/O1/ 10M/ 54T190/         | 2.94     |
| /J1/2/ 759000/    | /C1/C1/ 10M/ 54T190/         | 3.68     |
| /J1/2/ 759000/    | /C1/C1/ 10M/ 54T190/         | 3.78     |
| /J1/2/ 759000/    | /C1/C1/ 10M/ 54T190/         | 3.74     |
| Total 26 contacts |                              |          |

*Tcas*OBP9A  $\beta$ -ionone

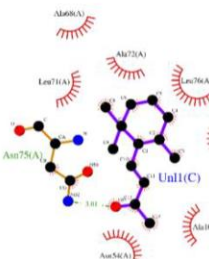[illegible]

*TcasOBP9B* β-ionone

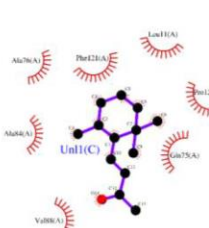[illegible]

*Tcas*OBP9A 4,8-dimethyl-decanal

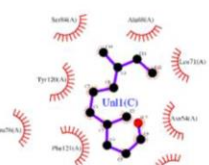[illegible]

*Tcas*OBP9B 4,8-dimethyl-decanal

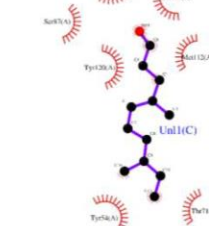[illegible]

*TcasOBP9A* 2-heptanal

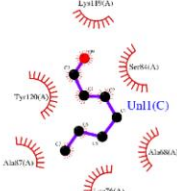[illegible]

*TcasOBP9B* 2-heptanal

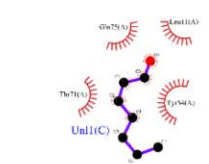[illegible]

TcasOBP9A 6-methyl-5-hepten-2-one

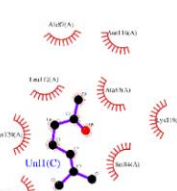

| SOURCE ATOMS | TARGET ATOMS                                          | DISTANCE |
|--------------|-------------------------------------------------------|----------|
| <i>1</i> /C1 | <i>1</i> /C1200/CH2 (C1) 3.46<br>1/PN1/MDR1 (C1) 3.46 | 3.46     |
| <i>1</i> /C1 | <i>1</i> /C1200/CH2 (C1) 3.79<br>1/PN1/MDR1 (C1) 3.79 | 3.79     |
| <i>1</i> /C1 | <i>1</i> /C1200/CH2 (C1) 3.78<br>1/PN1/MDR1 (C1) 3.78 | 3.78     |
| <i>1</i> /C1 | <i>1</i> /C1200/CH2 (C1) 3.74<br>1/PN1/MDR1 (C1) 3.74 | 3.74     |
| <i>1</i> /C1 | <i>1</i> /C1200/CH2 (C1) 3.70<br>1/PN1/MDR1 (C1) 3.70 | 3.70     |
| <i>1</i> /C1 | <i>1</i> /C1200/CH2 (C1) 3.55<br>1/PN1/MDR1 (C1) 3.55 | 3.55     |
| <i>1</i> /C1 | <i>1</i> /C1200/CH2 (C1) 3.52<br>1/PN1/MDR1 (C1) 3.52 | 3.52     |
| <i>1</i> /C1 | <i>1</i> /C1200/CH2 (C1) 3.77<br>1/PN1/MDR1 (C1) 3.77 | 3.77     |
| <i>1</i> /C1 | <i>1</i> /C1200/CH2 (C1) 3.86<br>1/PN1/MDR1 (C1) 3.86 | 3.86     |
| <i>1</i> /C1 | <i>1</i> /C1200/CH2 (C1) 3.85<br>1/PN1/MDR1 (C1) 3.85 | 3.85     |
| <i>1</i> /C1 | <i>1</i> /C1200/CH2 (C1) 3.79<br>1/PN1/MDR1 (C1) 3.79 | 3.79     |
| <i>1</i> /C1 | <i>1</i> /C1200/CH2 (C1) 3.89<br>1/PN1/MDR1 (C1) 3.89 | 3.89     |
| <i>1</i> /C1 | <i>1</i> /C1200/CH2 (C1) 3.87<br>1/PN1/MDR1 (C1) 3.87 | 3.87     |
| <i>1</i> /C1 | <i>1</i> /C1200/CH2 (C1) 3.84<br>1/PN1/MDR1 (C1) 3.84 | 3.84     |
| <i>1</i> /C1 | <i>1</i> /C1200/CH2 (C1) 3.88<br>1/PN1/MDR1 (C1) 3.88 | 3.88     |
| <i>1</i> /C1 | <i>1</i> /C1200/CH2 (C1) 3.85<br>1/PN1/MDR1 (C1) 3.85 | 3.85     |
| <i>1</i> /C1 | <i>1</i> /C1200/CH2 (C1) 3.84<br>1/PN1/MDR1 (C1) 3.84 | 3.84     |
| <i>1</i> /C1 | <i>1</i> /C1200/CH2 (C1) 3.86<br>1/PN1/MDR1 (C1) 3.86 | 3.86     |
| <i>1</i> /C1 | <i>1</i> /C1200/CH2 (C1) 3.72<br>1/PN1/MDR1 (C1) 3.72 | 3.72     |
| <i>1</i> /C1 | <i>1</i> /C1200/CH2 (C1) 3.76<br>1/PN1/MDR1 (C1) 3.76 | 3.76     |
| <i>1</i> /C1 | <i>1</i> /C1200/CH2 (C1) 3.81<br>1/PN1/MDR1 (C1) 3.81 | 3.81     |
| <i>1</i> /C1 | <i>1</i> /C1200/CH2 (C1) 3.82<br>1/PN1/MDR1 (C1) 3.82 | 3.82     |
| <i>1</i> /C1 | <i>1</i> /C1200/CH2 (C1) 3.80<br>1/PN1/MDR1 (C1) 3.80 | 3.80     |
| <i>1</i> /C1 | <i>1</i> /C1200/CH2 (C1) 3.82<br>1/PN1/MDR1 (C1) 3.82 | 3.82     |
| <i>1</i> /C1 | <i>1</i> /C1200/CH2 (C1) 3.77<br>1/PN1/MDR1 (C1) 3.77 | 3.77     |
| <i>1</i> /C1 | <i>1</i> /C1200/CH2 (C1) 3.77<br>1/PN1/MDR1 (C1) 3.77 | 3.77     |
| <i>1</i> /C1 | <i>1</i> /C1200/CH2 (C1) 3.82<br>1/PN1/MDR1 (C1) 3.82 | 3.82     |
| <i>1</i> /C1 | <i>1</i> /C1200/CH2 (C1) 3.79<br>1/PN1/MDR1 (C1) 3.79 | 3.79     |
| <i>1</i> /C1 | <i>1</i> /C1200/CH2 (C1) 3.82<br>1/PN1/MDR1 (C1) 3.82 | 3.82     |
| <i>1</i> /C1 | <i>1</i> /C1200/CH2 (C1) 3.78<br>1/PN1/MDR1 (C1) 3.78 | 3.78     |
| <i>1</i> /C1 | <i>1</i> /C1200/CH2 (C1) 3.80<br>1/PN1/MDR1 (C1) 3.80 | 3.80     |
| <i>1</i> /C1 | <i>1</i> /C1200/CH2 (C1) 3.74<br>1/PN1/MDR1 (C1) 3.74 | 3.74     |
| <i>1</i> /C1 | <i>1</i> /C1200/CH2 (C1) 3.57<br>1/PN1/MDR1 (C1) 3.57 | 3.57     |
| <i>1</i> /C1 | <i>1</i> /C1200/CH2 (C1) 3.24<br>1/PN1/MDR1 (C1) 3.24 | 3.24     |
| <i>1</i> /C1 | <i>1</i> /C1200/CH2 (C1) 3.23<br>1/PN1/MDR1 (C1) 3.23 | 3.23     |
| <i>1</i> /C1 | <i>1</i> /C1200/CH2 (C1) 3.23<br>1/PN1/MDR1 (C1) 3.23 | 3.23     |
| <i>1</i> /C1 | <i>1</i> /C1200/CH2 (C1) 3.70<br>1/PN1/MDR1 (C1) 3.70 | 3.70     |
| <i>1</i> /C1 | <i>1</i> /C1200/CH2 (C1) 2.93<br>1/PN1/MDR1 (C1) 2.93 | 2.93     |

TcasOBP9B6-methyl-5-hepten-2-one

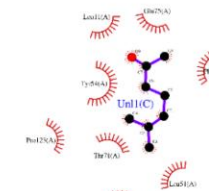

| SOURCE ATOMS                                                                                                                                                                                                                                                                                                                                                                                                                                                                                                                                                                                                                                                                                                                                                                                                                                                                                                                                                                                                                                                                                                                                                                                                                                                                                                                                                                                                                                                                                                                                                                                                                                                                                                                                                                                                                                                                                                                                                                                                                                                                                                                                                                                                                                                                                                                                                                                                                                                                                                                                                                                                                                                                                                                                                                                                                                                                                                                                                                                                                                                                                                                                                                                                                                                                                                                                                                                                                                                                                                                                                                                                                                                                                                                                                                                                                                                                                                                                                                                                                                                                                                                                                                                                                                                                                                                                                                                                                                                                                                                                                                                                                                                                                                                                                                                                                                                                                                                                                                                                                                                                                                                                                                                                                                                                                                                                                                                                                                                                                                                                                                                                                                                                                                                                                                                                                                                                                                                                                                                                                                                                                                                                                                                                                                                                                                                                                                                                                                                                                                                                                                                                                                                                                                                                                                                                                                                                                                                                                                                                                                                                                                                                                                                                                                                                                                                                                                                                                                                                                                                                                                                                                                                                                                                                                                                                                                                                                                                                                                                                                                                                                                                                                                                                                                                                                                                                                                                                                                                                                                                                                                                                                                                                                                                                                                                                                                                                                                                                                                                                                                                                                                                                                                                                                                                                                                                                                                                                                                                                                                                                                                                                                                                                                                                                                                                                                                                                                                                                                                                                                                                                                                                                                                                                                                                                                                                                                                                                                                                                                                                                                                                                                                                                                                                                                                                                                                                                                                                                                                                                                                                                                                                                                                                                                                                                                                                                                                                                                                                                                                                                                                                                                                                                                                                                                                                                                                                                                                                                                                                                                                                                                                                                                                                                                                                                                                                                                                                                                                                                                                                                                                                                                                                                                                                                                                                                                                                         | TARGET ATOMS | DISTANCE |
|----------------------------------------------------------------------------------------------------------------------------------------------------------------------------------------------------------------------------------------------------------------------------------------------------------------------------------------------------------------------------------------------------------------------------------------------------------------------------------------------------------------------------------------------------------------------------------------------------------------------------------------------------------------------------------------------------------------------------------------------------------------------------------------------------------------------------------------------------------------------------------------------------------------------------------------------------------------------------------------------------------------------------------------------------------------------------------------------------------------------------------------------------------------------------------------------------------------------------------------------------------------------------------------------------------------------------------------------------------------------------------------------------------------------------------------------------------------------------------------------------------------------------------------------------------------------------------------------------------------------------------------------------------------------------------------------------------------------------------------------------------------------------------------------------------------------------------------------------------------------------------------------------------------------------------------------------------------------------------------------------------------------------------------------------------------------------------------------------------------------------------------------------------------------------------------------------------------------------------------------------------------------------------------------------------------------------------------------------------------------------------------------------------------------------------------------------------------------------------------------------------------------------------------------------------------------------------------------------------------------------------------------------------------------------------------------------------------------------------------------------------------------------------------------------------------------------------------------------------------------------------------------------------------------------------------------------------------------------------------------------------------------------------------------------------------------------------------------------------------------------------------------------------------------------------------------------------------------------------------------------------------------------------------------------------------------------------------------------------------------------------------------------------------------------------------------------------------------------------------------------------------------------------------------------------------------------------------------------------------------------------------------------------------------------------------------------------------------------------------------------------------------------------------------------------------------------------------------------------------------------------------------------------------------------------------------------------------------------------------------------------------------------------------------------------------------------------------------------------------------------------------------------------------------------------------------------------------------------------------------------------------------------------------------------------------------------------------------------------------------------------------------------------------------------------------------------------------------------------------------------------------------------------------------------------------------------------------------------------------------------------------------------------------------------------------------------------------------------------------------------------------------------------------------------------------------------------------------------------------------------------------------------------------------------------------------------------------------------------------------------------------------------------------------------------------------------------------------------------------------------------------------------------------------------------------------------------------------------------------------------------------------------------------------------------------------------------------------------------------------------------------------------------------------------------------------------------------------------------------------------------------------------------------------------------------------------------------------------------------------------------------------------------------------------------------------------------------------------------------------------------------------------------------------------------------------------------------------------------------------------------------------------------------------------------------------------------------------------------------------------------------------------------------------------------------------------------------------------------------------------------------------------------------------------------------------------------------------------------------------------------------------------------------------------------------------------------------------------------------------------------------------------------------------------------------------------------------------------------------------------------------------------------------------------------------------------------------------------------------------------------------------------------------------------------------------------------------------------------------------------------------------------------------------------------------------------------------------------------------------------------------------------------------------------------------------------------------------------------------------------------------------------------------------------------------------------------------------------------------------------------------------------------------------------------------------------------------------------------------------------------------------------------------------------------------------------------------------------------------------------------------------------------------------------------------------------------------------------------------------------------------------------------------------------------------------------------------------------------------------------------------------------------------------------------------------------------------------------------------------------------------------------------------------------------------------------------------------------------------------------------------------------------------------------------------------------------------------------------------------------------------------------------------------------------------------------------------------------------------------------------------------------------------------------------------------------------------------------------------------------------------------------------------------------------------------------------------------------------------------------------------------------------------------------------------------------------------------------------------------------------------------------------------------------------------------------------------------------------------------------------------------------------------------------------------------------------------------------------------------------------------------------------------------------------------------------------------------------------------------------------------------------------------------------------------------------------------------------------------------------------------------------------------------------------------------------------------------------------------------------------------------------------------------------------------------------------------------------------------------------------------------------------------------------------------------------------------------------------------------------------------------------------------------------------------------------------------------------------------------------------------------------------------------------------------------------------------------------------------------------------------------------------------------------------------------------------------------------------------------------------------------------------------------------------------------------------------------------------------------------------------------------------------------------------------------------------------------------------------------------------------------------------------------------------------------------------------------------------------------------------------------------------------------------------------------------------------------------------------------------------------------------------------------------------------------------------------------------------------------------------------------------------------------------------------------------------------------------------------------------------------------------------------------------------------------------------------------------------------------------------------------------------------------------------------------------------------------------------------------------------------------------------------------------------------------------------------------------------------------------------------------------------------------------------------------------------------------------------------------------------------------------------------------------------------------------------------------------------------------------------------------------------------------------------------------------------------------------------------------------------------------------------------------------------------------------------------------------------------------------------------------------------------------------------------------------------------------------------------------------------------------------------------------------------------------------------------------------------------------------------------------------------------------------------------------------------------------------------------------------------------------------------------------------------------------------------------------------------------------------------------------------------------------------------------------------------------------------------------------------------------------------------------------------------------------------------------------------------------------------------------------------------------------------------------------------------------------------------------------------------------------------------------------------------------------------------------------------------------------------------------------------------------------------------------------------------------------------------------------------------------------------------------------------------------------------------------------------------------------------------------------------------------------------------------------------------------------------------------------------------------------------------------------------------------------------------------------------------------------|--------------|----------|
| <i>N</i> (1)C10C11C12C13C14C15C16C17C18C19C20C21C22C23C24C25C26C27C28C29C30C31C32C33C34C35C36C37C38C39C40C41C42C43C44C45C46C47C48C49C50C51C52C53C54C55C56C57C58C59C60C61C62C63C64C65C66C67C68C69C70C71C72C73C74C75C76C77C78C79C80C81C82C83C84C85C86C87C88C89C90C91C92C93C94C95C96C97C98C99C100C101C102C103C104C105C106C107C108C109C110C111C112C113C114C115C116C117C118C119C120C121C122C123C124C125C126C127C128C129C130C131C132C133C134C135C136C137C138C139C140C141C142C143C144C145C146C147C148C149C150C151C152C153C154C155C156C157C158C159C160C161C162C163C164C165C166C167C168C169C170C171C172C173C174C175C176C177C178C179C180C181C182C183C184C185C186C187C188C189C190C191C192C193C194C195C196C197C198C199C200C201C202C203C204C205C206C207C208C209C210C211C212C213C214C215C216C217C218C219C220C221C222C223C224C225C226C227C228C229C230C231C232C233C234C235C236C237C238C239C240C241C242C243C244C245C246C247C248C249C250C251C252C253C254C255C256C257C258C259C260C261C262C263C264C265C266C267C268C269C270C271C272C273C274C275C276C277C278C279C280C281C282C283C284C285C286C287C288C289C290C291C292C293C294C295C296C297C298C299C300C301C302C303C304C305C306C307C308C309C310C311C312C313C314C315C316C317C318C319C320C321C322C323C324C325C326C327C328C329C330C331C332C333C334C335C336C337C338C339C340C341C342C343C344C345C346C347C348C349C350C351C352C353C354C355C356C357C358C359C360C361C362C363C364C365C366C367C368C369C370C371C372C373C374C375C376C377C378C379C380C381C382C383C384C385C386C387C388C389C390C391C392C393C394C395C396C397C398C399C400C401C402C403C404C405C406C407C408C409C410C411C412C413C414C415C416C417C418C419C420C421C422C423C424C425C426C427C428C429C430C431C432C433C434C435C436C437C438C439C440C441C442C443C444C445C446C447C448C449C450C451C452C453C454C455C456C457C458C459C460C461C462C463C464C465C466C467C468C469C470C471C472C473C474C475C476C477C478C479C480C481C482C483C484C485C486C487C488C489C490C491C492C493C494C495C496C497C498C499C500C501C502C503C504C505C506C507C508C509C510C511C512C513C514C515C516C517C518C519C520C521C522C523C524C525C526C527C528C529C530C531C532C533C534C535C536C537C538C539C540C541C542C543C544C545C546C547C548C549C550C551C552C553C554C555C556C557C558C559C560C561C562C563C564C565C566C567C568C569C570C571C572C573C574C575C576C577C578C579C580C581C582C583C584C585C586C587C588C589C590C591C592C593C594C595C596C597C598C599C600C601C602C603C604C605C606C607C608C609C610C611C612C613C614C615C616C617C618C619C620C621C622C623C624C625C626C627C628C629C630C631C632C633C634C635C636C637C638C639C640C641C642C643C644C645C646C647C648C649C650C651C652C653C654C655C656C657C658C659C660C661C662C663C664C665C666C667C668C669C670C671C672C673C674C675C676C677C678C679C680C681C682C683C684C685C686C687C688C689C690C691C692C693C694C695C696C697C698C699C700C701C702C703C704C705C706C707C708C709C710C711C712C713C714C715C716C717C718C719C720C721C722C723C724C725C726C727C728C729C730C731C732C733C734C735C736C737C738C739C740C741C742C743C744C745C746C747C748C749C750C751C752C753C754C755C756C757C758C759C760C761C762C763C764C765C766C767C768C769C770C771C772C773C774C775C776C777C778C779C780C781C782C783C784C785C786C787C788C789C790C791C792C793C794C795C796C797C798C799C800C801C802C803C804C805C806C807C808C809C810C811C812C813C814C815C816C817C818C819C820C821C822C823C824C825C826C827C828C829C830C831C832C833C834C835C836C837C838C839C840C841C842C843C844C845C846C847C848C849C850C851C852C853C854C855C856C857C858C859C860C861C862C863C864C865C866C867C868C869C870C871C872C873C874C875C876C877C878C879C880C881C882C883C884C885C886C887C888C889C890C891C892C893C894C895C896C897C898C899C900C901C902C903C904C905C906C907C908C909C910C911C912C913C914C915C916C917C918C919C920C921C922C923C924C925C926C927C928C929C930C931C932C933C934C935C936C937C938C939C940C941C942C943C944C945C946C947C948C949C950C951C952C953C954C955C956C957C958C959C960C961C962C963C964C965C966C967C968C969C970C971C972C973C974C975C976C977C978C979C980C981C982C983C984C985C986C987C988C989C990C991C992C993C994C995C996C997C998C999C1000C1001C1002C1003C1004C1005C1006C1007C1008C1009C1010C1011C1012C1013C1014C1015C1016C1017C1018C1019C1020C1021C1022C1023C1024C1025C1026C1027C1028C1029C1030C1031C1032C1033C1034C1035C1036C1037C1038C1039C1040C1041C1042C1043C1044C1045C1046C1047C1048C1049C1050C1051C1052C1053C1054C1055C1056C1057C1058C1059C1060C1061C1062C1063C1064C1065C1066C1067C1068C1069C1070C1071C1072C1073C1074C1075C1076C1077C1078C1079C1080C1081C1082C1083C1084C1085C1086C1087C1088C1089C1090C1091C1092C1093C1094C1095C1096C1097C1098C1099C1100C1101C1102C1103C1104C1105C1106C1107C1108C1109C1110C1111C1112C1113C1114C1115C1116C1117C1118C1119C1120C1121C1122C1123C1124C1125C1126C1127C1128C1129C1130C1131C1132C1133C1134C1135C1136C1137C1138C1139C1140C1141C1142C1143C1144C1145C1146C1147C1148C1149C1150C1151C1152C1153C1154C1155C1156C1157C1158C1159C1160C1161C1162C1163C1164C1165C1166C1167C1168C1169C1170C1171C1172C1173C1174C1175C1176C1177C1178C1179C1180C1181C1182C1183C1184C1185C1186C1187C1188C1189C1190C1191C1192C1193C1194C1195C1196C1197C1198C1199C1200C1201C1202C1203C1204C1205C1206C1207C1208C1209C1210C1211C1212C1213C1214C1215C1216C1217C1218C1219C1220C1221C1222C1223C1224C1225C1226C1227C1228C1229C1230C1231C1232C1233C1234C1235C1236C1237C1238C1239C1240C1241C1242C1243C1244C1245C1246C1247C1248C1249C1250C1251C1252C1253C1254C1255C1256C1257C1258C1259C1260C1261C1262C1263C1264C1265C1266C1267C1268C1269C1270C1271C1272C1273C1274C1275C1276C1277C1278C1279C1280C1281C1282C1283C1284C1285C1286C1287C1288C1289C1290C1291C1292C1293C1294C1295C1296C1297C1298C1299C1300C1301C1302C1303C1304C1305C1306C1307C1308C1309C1310C1311C1312C1313C1314C1315C1316C1317C1318C1319C1320C1321C1322C1323C1324C1325C1326C1327C1328C1329C1330C1331C1332C1333C1334C1335C1336C1337C1338C1339C1340C1341C1342C1343C1344C1345C1346C1347C1348C1349C1350C1351C1352C1353C1354C1355C1356C1357C1358C1359C1360C1361C1362C1363C1364C1365C1366C1367C1368C1369C1370C1371C1372C1373C1374C1375C1376C1377C1378C1379C1380C1381C1382C1383C1384C1385C1386C1387C1388C1389C1390C1391C1392C1393C1394C1395C1396C1397C1398C1399C1400C1401C1402C1403C1404C1405C1406C1407C1408C1409C1410C1411C1412C1413C1414C1415C1416C1417C1418C1419C1420C1421C1422C1423C1424C1425C1426C1427C1428C1429C1430C1431C1432C1433C1434C1435C1436C1437C1438C1439C1440C1441C1442C1443C1444C1445C1446C1447C1448C1449C1450C1451C1452C1453C1454C1455C1456C1457C1458C1459C1460C1461C1462C1463C1464C1465C1466C1467C1468C1469C1470C1471C1472C1473C1474C1475C1476C1477C1478C1479C1480C1481C1482C1483C1484C1485C1486C1487C1488C1489C1490C1491C1492C1493C1494C1495C1496C1497C1498C1499C1500C1501C1502C1503C1504C1505C1506C1507C1508C1509C1510C1511C1512C1513C1514C1515C1516C1517C1518C1519C1520C1521C1522C1523C1524C1525C1526C1527C1528C1529C1530C1531C1532C1533C1534C1535C1536C1537C1538C1539C1540C1541C1542C1543C1544C1545C1546C1547C1548C1549C1550C1551C1552C1553C1554C1555C1556C1557C1558C1559C1560C1561C1562C1563C1564C1565C1566C1567C1568C1569C1570C1571C1572C1573C1574C1575C1576C1577C1578C1579C1580C1581C1582C1583C1584C1585C1586C1587C1588C1589C1590C1591C1592C1593C1594C1595C1596C1597C1598C1599C1600C1601C1602C1603C1604C1605C1606C1607C1608C1609C1610C1611C1612C1613C1614C1615C1616C1617C1618C1619C1620C1621C1622C1623C1624C1625C1626C1627C1628C1629C1630C1631C1632C1633C1634C1635C1636C1637C1638C1639C1640C1641C1642C1643C1644C1645C1646C1647C1648C1649C1650C1651C1652C1653C1654C1655C1656C1657C1658C1659C1660C1661C1662C1663C1664C1665C1666C1667C1668C1669C1670C1671C1672C1673C1674C1675C1676C1677C1678C1679C1680C1681C1682C1683C1684C1685C1686C1687C1688C1689C1690C1691C1692C1693C1694C1695C1696C1697C1698C1699C1700C1701C1702C1703C1704C1705C1706C1707C1708C1709C1710C1711C1712C1713C1714C1715C1716C1717C1718C1719C1720C1721C1722C1723C1724C1725C1726C1727C1728C1729C1730C1731C1732C1733C1734C1735C1736C1737C1738C1739C1740C1741C1742C1743C1744C1745C1746C1747C1748C1749C1750C1751C1752C1753C1754C1755C1756C1757C1758C1759C1760C1761C1762C1763C1764C1765C1766C1767C1768C1769C1770C1771C1772C1773C1774C1775C1776C1777C1778C1779C1780C1781C1782C1783C1784C1785C1786C1787C1788C1789C1790C1791C1792C1793C1794C1795C1796C1797C1798C1799C1800C1801C1802C1803C1804C1805C1806C1807C1808C1809C1810C1811C1812C1813C1814C1815C1816C1817C1818C1819C1820C1821C1822C1823C1824C1825C1826C1827C1828C1829C1830C1831C1832C1833C1834C1835C1836C1837C1838C1839C1840C1841C1842C1843C1844C1845C1846C1847C1848C1849C1850C1851C1852C1853C1854C1855C1856C1857C1858C1859C1860C1861C1862C1863C1864C1865C1866C1867C1868C1869C1870C1871C1872C1873C1874C1875C1876C1877C1878C1879C1880C1881C1882C1883C1884C1885C1886C1887C1888C1889C1890C1891C1892C1893C1894C1895C1896C1897C1898C1899C1900C1901C1902C1903C1904C1905C1906C1907C1908C1909C1910C1911C1912C1913C1914C1915C1916C1917C1918C1919C1920C1921C1922C1923C1924C1925C1926C1927C1928C1929C1930C1931C1932C1933C1934C1935C1936C1937C1938C1939C1940C1941C1942C1943C1944C1945C1946C1947C1948C1949C1950C1951C1952C1953C1954C1955C1956C1957C1958C1959C1960C1961C1962C1963C1964C1965C1966C1967C1968C1969C1970C1971C1972C1973C1974C1975C1976C1977C1978C1979C1980C1981C1982C1983C1984C1985C1986C1987C1988C1989C1990C1991C1992C1993C1994C1995C1996C1997C1998C1999C2000C2001C2002C2003C2004C2005C2006C2007C2008C2009C2010C2011C2012C2013C2014C2015C2016C2017C2018C2019C2020C2021C2022C2023C2024C2025C2026C2027C2028C2029C2030C2031C2032C2033C2034C2035C2036C2037C2038C2039C2040C2041C2042C2043C2044C2045C2046C2047C2048C2049C2050C2051C2052C2053C2054C2055C2056C2057C2058C2059C2060C2061C2062C2063C2064C2065C2066C2067C2068C2069C2070C2071C2072C2073C2074C2075C2076C2077C2078C2079C2080C2081C2082C2083C2084C2085C2086C2087C2088C2089C2090C2091C2092C2093C2094C2095C2096C2097C2098C2099C2100C2101C2102C2103C2104C2105C2106C2107C2108C2109C2110C2111C2112C2113C2114C2115C2116C2117C2118C2119C2120C2121C2122C2123C2124C2125C2126C2127C2128C2129C2130C2131C2132C2133C2134C2135C2136C2137C2138C2139C2140C2141C2142C2143C2144C2145C2146C2147C2148C2149C2150C2151C2152C2153C2154C2155C2156C2157C2158C2159C2160C2161C2162C2163C2164C2165C2166C2167C2168C2169C2170C2171C2172C2173C2174C2175C2176C2177C2178C2179C2180C2181C2182C2183C2184C2185C2186C2187C2188C2189C2190C2191C2192C2193C2194C2195C2196C2197C2198C2199C2200C2201C2202C2203C2204C2205C2206C2207C2208C2209C2210C2211C2212C2213C2214C2215C2216C2217C2218C2219C2220C2221C2222C2223C2224C2225C2226C2227C2228C2229C2230C2231C2232C2233C2234C2235C2236C2237C2238C2239C2240C2241C2242C2243C2244C2245C2246C2247C2248C2249C2250C2251C2252C2253C2254C2255C2256C2257C2258C2259C2260C2261C2262C2263C2264C2265C2266C2267C2268C2269C2270C2271C2272C2273C2274C2275C2276C2277C2278C2279C2280C2281C2282C2283C2284C2285C2286C2287C2288C2289C2290C2291C2292C2293C2294C2295C2296C2297C2298C2299C2300C2301C2302C2303C2304C2305C2306C2307C2308C2309C2310C2311C2312C2313C2314C2315C2316C2317C2318C2319C2320C2321C2322C2323C2324C2325C2326C2327C2328C2329C2330C2331C2332C2333C2334C2335C2336C2337C2338C2339C2340C2341C2342C2343C2344C2345C2346C2347C2348C2349C2350C2351C2352C2353C2354C2355C2356C2357C2358C2359C2360C2361C2362C2363C2364C2365C2366C2367C2368C2369C2370C2371C2372C2373C2374C2375C2376C2377C2378C2379C2380C2381C2382C2383C2384C2385C2386C2387C2388C2389C2390C2391C2392C2393C2394C2395C2396C2397C2398C2399C2400C2401C2402C2403C2404C2405C2406C2407C2408C2409C2410C2411C2412C2413C2414C2415C2416C2417C2418C2419C2420C2421C2422C2423C2424C2425C2426C2427C2428C2429C2430C2431C2432C2433C2434C2435C2436C2437C2438C2439C2440C2441C2442C2443C2444C2445C2446C2447C2448C2449C2450C2451C2452C2453C2454C2455C2456C2457C2458C2459C2460C2461C2462C2463C2464C2465C2466C2467C2468C2469C2470C2471C2472C2473C2474C2475C2476C2477C2478C2479C2480C2481C2482C2483C2484C2485C2486C2487C2488C2489C2490C2491C2492C2493C2494C2495C2496C2497C2498C2499C2500C2501C2502C2503C2504C2505C2506C2507C2508C2509C2510C2511C2512C2513C2514C2515C2516C2517C2518C2519C2520C2521C2522C2523C2524C2525C2526C2527C2528C2529C2530C2531C2532C2533C2534C2535C2536C2537C2538C2539C2540C2541C2542C2543C2544C2545C2546C2547C2548C2549C2550C2551C2552C2553C2554C2555C2556C2557C2558C2559C2560C2561C2562C2563C2564C2565C2566C2567C2568C2569C2570C2571C2572C2573C2574C2575C2576C2577C2578C2579C2580C2581C2582C2583C2584C2585C2586C2587C2588C2589C2590C2591C2592C2593C2594C2595C2596C2597C2598C2599C2600C2601C2602C2603C2604C2605C2606C2607C2608C2609C2610C2611C2612C2613C2614C2615C2616C2617C2618C2619C2620C2621C2622C2623C2624C2625C2626C2627C2628C2629C2630C2631C2632C2633C2634C2635C2636C2637C2638C2639C2640C2641C2642C2643C2644C2645C2646C2647C2648C2649C2650C2651C2652C2653C2654C2655C2656C2657C2658C2659C2660C2661C2662C2663C2664C2665C2666C2667C2668C2669C2670C2671C2672C2673C2674C2675C2676C2677C2678C2679C2680C2681C2682C2683C2684C2685C2686C2687C2688C2689C2690C2691C2692C2693C269 |              |          |

**Figure S4.** OBP-odor interactions. Two-dimensional (2D) ligand-protein interaction diagrams have been prepared for each docked ligand using the LigPlot+ software. The detailed list of inter-atomic distance between receptor atoms and docked ligands is listed on the right side of each 2D diagram (prepared with ncont program from the CCP4 suite).

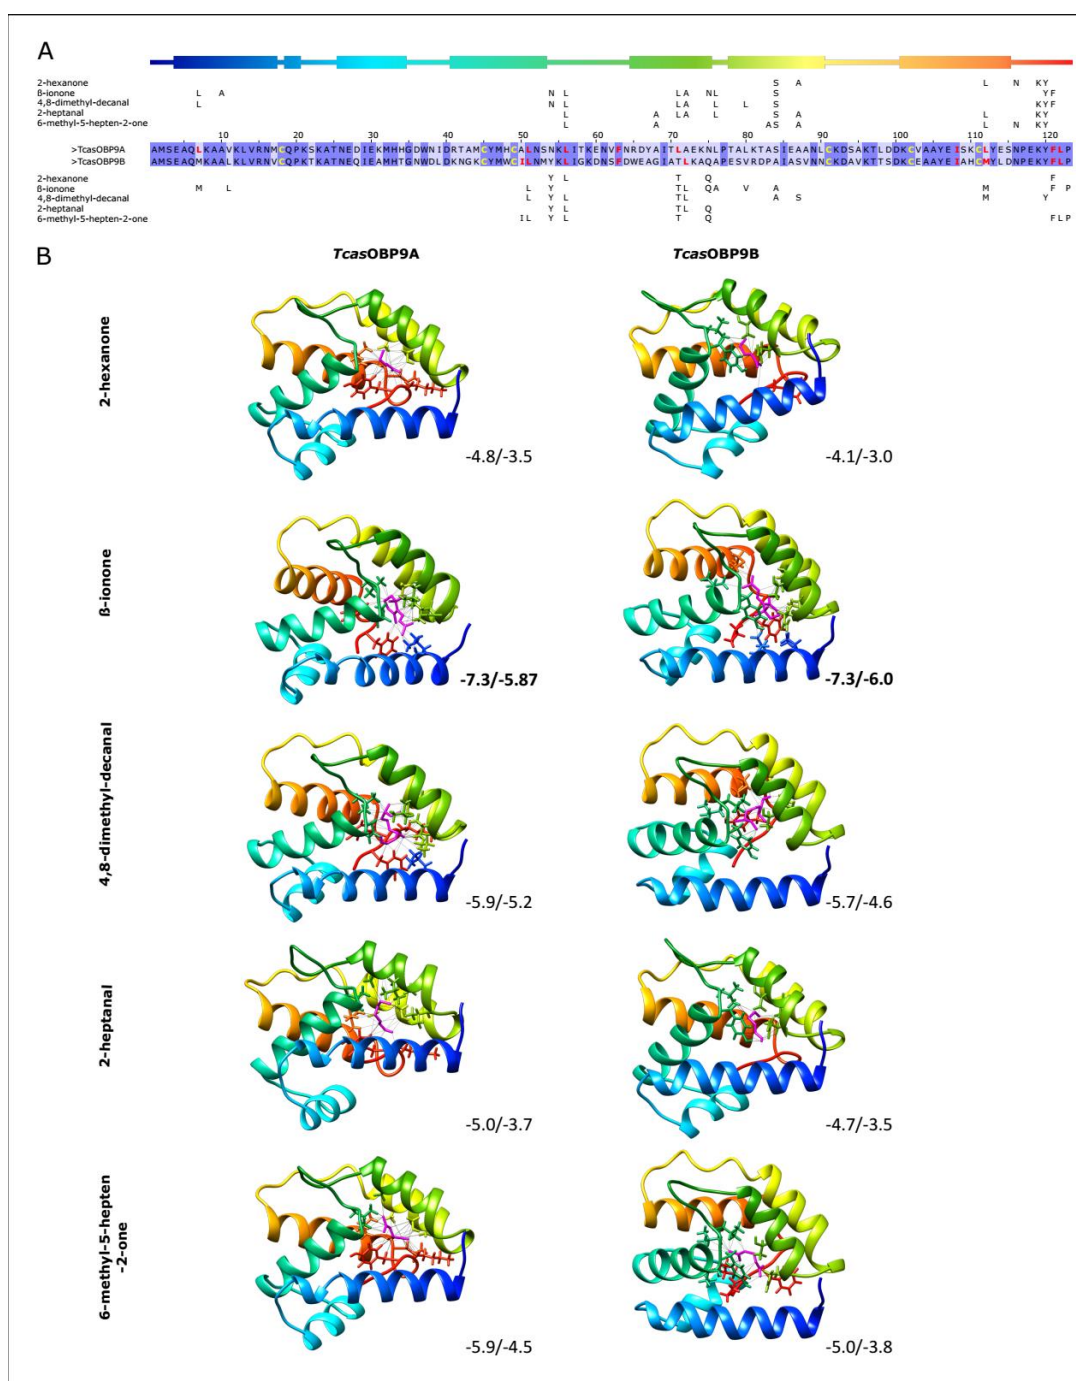

**Figure S5.** Odor-binding of TcasOBP9A and OBP9B (A) The domain structure of OBP9A with coloring corresponding to the rainbow ribbon model in B. Amino acid alignment of TcasOBP9A and TcasOBP9B as in Figure 4. Above and below of the alignment, the amino acid residues which are in predicted contact with the corresponding odor are depicted (based docking experiments with qvina and smina and prediction with Chimera's find clash/contacts). (B) Ribbon model of OBP9A and OBP9B binding the odors 2-hexanone,  $\beta$ -ionone, 4,8-dimethyl-decanal, 2-heptenal, or 6-methyl-5-hepten-2-one, respectively, based on modelling with ROSETTA (Song et al., 2013) [79] and visualized with Chimera (Pettersen et al., 2004) [93]. The residues that have contact to the respective odor are depicted as stick models, pseudo-bonds are shown in grey. Next to the models, the calculated affinities in kcal/mol (qvina/smina) are provided.

**Supplementary List 1: List of species used for calculating the phylogenetic tree.**

- >Amel; *Apis mellifera* (Elsik et al., 2014; Foret and Maleszka, 2006) [48,49].
- >Hsal; *Arpegnathos saltator* (Bonasio et al., 2010; McKenzie et al., 2014) [50,51].
- >Lhum; *Linepithema humile* (Smith et al., 2011) [52].
- >Nvir; *Nasonia vitripennis* (Vieira et al., 2012) [53].
- >Bmor; *Bombyx mori* (Gong et al., 2009) [54].
- >Hmel; *Heliconius melpomene* (Heliconius Genome Consortium et al., 2012) [55].
- >Dple; *Danaus plexippus* (Zhan and Reppert, 2013) [56].
- >Gmor; *Glossina morsitans* (Liu et al., 2010) [57].
- >Agam; *Anopheles gambiae* (Lawson et al., 2009; Vieira and Rozas, 2011) [58,59].
- >Dmel; *Drosophila melanogaster* (Consortium, 2003) [45].
- >Achi; *Anoplophora chinensis* (Wang et al., 2017) [60].
- >Acor; *Anomala corpulenta* (X. Li et al., 2015) [61].
- >Aqua; *Ambrostoma quadriimpressum* (Wang et al., 2016) [62].
- >Blon; *Brontispa longissimi* (Bin et al., 2017a) [63].
- >Cbow; *Colaphellus bowringi* (X.-M. Li et al., 2015) [64].
- >Cchi; *Callosobruchus chinensis* (Zhang et al., 2017) [65].
- >Cfor; *Cylas formicarius* (Bin et al., 2017b) [66].
- >Dpon; *Dendroctonus ponderosae* (Andersson et al., 2013; Keeling et al., 2013) [67,68].
- >Hobl; *Holotrichia oblita* (Yin et al., 2019) [69].
- >Gdau; *Galeruca daurica* (Li et al., 2017). [70]
- >Ldec; *Leptinotarsa decemlineata* (Liu et al., 2015) [71].
- >Rfer; *Rhynchophorus ferrugineus* (Yan et al., 2016) [72].
- >Tcas; *Tribolium castaneum* (Dippel et al., 2014) [21].
- >Bger; *Blattella germanica* (Robertson et al., 2018) [73].
- >Znev; *Zootermopsis nevadensis* (Terrapon et al., 2014) [74].
